# Supplementary material
Source: publisher site journal article supplement (https://www.dovepress.com/article/251780)
Supplement: Supplementary file 1 [file get_supplementary_file.php]

Supplementary Table 1: Demographic and laboratory data stratified by FRS with Chronological age(CA):

|  | **FRS with CA** | | | |
| --- | --- | --- | --- | --- |
|  | Low | Intermediate | High | p |
|  | n=14 | n=89 | n=51 |  |
| **Demographic data** |  |  |  |  |
| Known duration of diabetes | 12.50±11.25 | 12.66±8.29 | 12.47±7.84 | 0.849 |
| Years of school attendance | 10.21±3.33 | 9.51±4.62 | 9.08±4.11 | 0.515 |
| FH of known TD, n (%) | 1(7.1) | 12(13.5) | 2(3.9) | 0.175 |
| FH of premature CAD,n(%) | 8(57.1) | 33(37.1) | 18(35.3) | 0.308 |
| Retinopathy, yes, n (%) | 5(35.7) | 29(33.3) | 17(33.3) | 0.984 |
| **Anthropometric data** |  |  |  |  |
| BMI (kg/m²) | 31.13±4.56 | 30.61±5.28 | 30.81±5.65 | 0.983 |
| Waist (cm) | 96.78±13.85 | 98.49±11.22 | 101.96±11.60 | 0.413 |
| WHR (cm) | 0.95±0.12 | 0.96±0.08 | 1.00±0.11 | 0.034 |
| **Classical CV risk factors** |  |  |  |  |
| Sedentary lifestyle, n (%) | 8(57.1) | 64(71.9) | 37(72.5) | 0.499 |
| **Treatment data** |  |  |  |  |
| Aspirin, n (%) | 3(23.1) | 29(33) | 21(42.9) | 0.319 |
| Statins, n (%) | 5(35.7) | 71(79.8) | 44(86.3) | 0.001 |
| Basal insulin, n (%) | 10(71.4) | 49(55.1) | 26(52) | 0.429 |
| **Laboratory data** |  |  |  |  |
| CRP (mg/dl) | 0.48(0.01-2.67) | 0.30(0.01-4.29) | 0.30(0.01-2.27) | 0.375 |
| HbA1c (%) | 8.66±2.96 | 7.95±1.49 | 8.28±1.75 | 0.748 |
| TSH (µUI/mL) | 1.89±1,00 | 1.95±1.18 | 2.53±1.67 | 0.234 |
| Free T4 (ng/dL) | 1.23±0.17 | 1.21±0.176 | 1.28±0.154 | 0.044 |
| Triglycerides (mg/dl) | 151(41-480) | 151(42-820) | 241(61-731) | 0.005 |
| Albumin (g/dL) | 4.29±0.65 | 4.64±0.95 | 5.01±1.02 | 0.005 |
| GFR (ml/min/1.73m²) | 107.66±32.24 | 87.51±23.59 | 76.41±21.81 | 0.002 |
| Uric acid (mg/dl) | 5.24±2.00 | 5.77±1.94 | 7.15±2.49 | 0.001 |
| Albuminuria (mg/g) | 14.82(1.54-181.81) | 8.05(0.22-374.06) | 10.48(2.27-249.66) | 0.151 |
| **IMT data*** |  |  |  |  |
| Worst IMT side | 0.585±0.069 | 0.682±0.122 | 0.768±0.166 | 0.001 |

FRS= Framingham risk score. CA= chronological age. FH=family history. TD= thyroid disease. CAD= coronary artery disease. BMI= body mass index. WHR= waist-to-hip ratio.CV= cardiovascular. CRP= C-reactive protein. TSH = thyroid-stimulating hormone. Free T4= free thyroxine hormone. GFR= glomerular filtration rate calculated by CKD-EPI formula. IMT= intima-media thickness. Data are presented in mean ± SD or in median and interquartile range [IQR]. * IMT was obtained in 152 patients.

Supplementary Table 2: Demographic and laboratorial data stratified by FRS with VA:

|  | **FRS with VA** | | | |
| --- | --- | --- | --- | --- |
|  | Low | Intermediate | High | p |
|  | 14 | 75 | 63 |  |
| **Demographic data** |  |  |  |  |
| Known duration of diabetes (years) | 10.86±7.37 | 13.80±8.97 | 11.67±7.89 | 0.308 |
| Years of school attendance | 10.71±3.56 | 9.39±4.47 | 9.21±4.39 | 0.313 |
| FH of known TD, n (%) | 1(7.1) | 6(8.0) | 8(12.7) | 0.613 |
| FH of premature CAD, n (%) | 5(35.7) | 24(32) | 30(47.6) | 0.167 |
| Retinopathy, yes, n (%) | 3(21.4) | 32(43.2) | 16(25.8) | 0.059 |
| **Anthropometric data** |  |  |  |  |
| BMI (kg/m²) | 30.57±4.76 | 30.70±5.06 | 30.34±5.42 | 0.679 |
| Waist (cm) | 95.78±8.97 | 99.31±11.37 | 99.93±11.47 | 0.517 |
| WHR (cm) | 0.92±0.06 | 0.97±0.09 | 0.98±0.101 | 0.164 |
| **Classical CV risk factors** |  |  |  |  |
| Sedentary lifestyle, n (%) | 8(57.1) | 59(78.7) | 41(65.1) | 0.104 |
| **Treatment data** |  |  |  |  |
| Aspirin, n (%) | 4(28.6) | 27(37) | 22(36.1) | 0.833 |
| Statins, n (%) | 8(57.1) | 58(77.3) | 52(82.5) | 0.064 |
| Basal insulin, n (%) | 6(42.9) | 49(65.3) | 29(46.8) | 0.056 |
| **Laboratory data** |  |  |  |  |
| CRP (mg/dl) | 0.28(0.01-4.29) | 0.39(0.01-3.48) | 0.37(0.01-1.57) | 0.475 |
| HbA1c (%) | 7.18±0.758 | 8.39±1.86 | 7.95±1.64 | 0.045 |
| TSH (µUI/mL) | 1.68±0.91 | 2.02±1.37 | 2.31±1.38 | 0.105 |
| FreeT4 (ng/dL) | 1.27±0.13 | 1.23±0.17 | 1.23±0.17 | 0.693 |
| Triglycerides (mg/dl) | 137(41-308) | 151(46-731) | 231(52-820) | 0.007 |
| Albumin (g/dL) | 4.48±0.694 | 4.61±0.931 | 4.92±1.05 | 0.059 |
| GFR (ml/min/1.73m²) | 100.0±24.96 | 88.77±27.05 | 78.79±20.67 | 0.007 |
| Uric acid (mg/dl) | 5.71±1.70 | 5.72±2.19 | 6.76±2.27 | 0.006 |
| Albuminuria(mg/g) | 6.6(1.54-25.0) | 34.7(1.17-238.3) | 37.9(0.22-374.0) | 0.445 |
| **IMT data *** |  |  |  |  |
| Worst IMT side | 0.54±0.057 | 0.63±0.068 | 0.81±0.138 | 0.001 |

FRS= Framingham risk score. VA= vascular age. FH=family history. TD= thyroid disease. CAD= coronary artery disease. BMI= body mass index. WHR= waist-to-hip ratio.CV= cardiovascular. CRP= C-reactive protein. TSH = thyroid-stimulating hormone. Free T4= free thyroxine hormone. GFR= glomerular filtration rate calculated by CKD-EPI formula. IMT= intima media thickness. Data are presented in mean ± SD or in median and interquartile range [IQR]. * IMT was obtained in 152 patients.

Supplementary table 3: Demographic and laboratory data of the study population considering risk of category change.

|  | **Maintenance** | | **Decrease** | | **Increase** | | p |  |
| --- | --- | --- | --- | --- | --- | --- | --- | --- |
| **Demographic data (n=152)** | n= 98 | | n=20 | | n=34 | |  |  |
| Known duration of diabetes (years) | 13.27±8.79 | | 12.10±6.06 | | 11.18±8.55 | | 0.416 |  |
| Years of school attendance | 9.71±4.57 | | 8.85±3.58 | | 8.97±4.17 | | 0.435 |  |
| FH of known TD, n (%) | 7(7.1) | | 1(5.0) | | 7(20.6) | | 0.057 |  |
| FH of premature CAD, n (%) | 38(38.8) | | 3(15) | | 18(53.9) | | 0.022 |  |
| **Anthropometric data** |  |  |  |  |  |  |  |  |
| BMI (kg/m²) | 30.46±5.09 | | 31.15±5.04 | | 30.38±5.52 | | 0.664 |  |
| Waist (cm) | 98.89±10.99 | | 101.2±8.54 | | 99.11±13.21 | | 0.745 |  |
| WHR | 0.96±0.099 | | 0.99±0.097 | | 0.97±0.09 | | 0.314 |  |
| **Classical CV risk factors** |  |  |  |  |  |  |  |  |
| Sedentary lifestyle, n (%) | 69(70.4) | | 17(85) | | 22(64.7) | | 0.276 |  |
| **Treatment data** |  |  |  |  |  |  |  |  |
| Aspirin, n (%) | 35(36.8) | | 9(45) | | 9(27.3) | | 0.401 |  |
| Statins, n (%) | 79(80.6) | | 16(80) | | 22(67.6) | | 0.133 |  |
| Basal insulin, n (%) | 56(57.7) | | 10(50) | | 18(52.9) | | 0.767 |  |
| **Laboratory data** |  |  |  |  |  |  |  |  |
| CRP (mg/dl) | 0.34(0.01-3.48) | | 0.21(0.01-4.29) | | 0.28(0.01-2.60) | | 0.347 |  |
| HbA1c (%) | 8.05±1.56 | | 8.08±1.46 | | 8.23±2.26 | | 0.881 |  |
| TSH (µUI/mL) | 2.11±1.48 | | 2.19±1.40 | | 2.09±0.83 | | 0.545 |  |
| FreeT4 (ng/dL) | 1.25±0.17 | | 1.28±0.14 | | 1.17±0.17 | | 0.015 |  |
| Triglycerides (mg/dl) | 155(41-694) | | 160(74-731) | | 171(49-820) | | 0.728 |  |
| Albumin (g/dL) | 4.77±1.01 | | 4.70±0.80 | | 4.60±0.95 | | 0.703 |  |
| GFR (ml/min/1.73m²) | 85.03±24.09 | | 83.61±26.06 | | 88.72±27.89 | | 0.929 |  |
| Uric acid (mg/dl) | 6.10±2.25 | | 6.64±2.43 | | 6.00±2.05 | | 0.697 |  |
| Albuminuria (mg/g) | 8.69(1.17-249.6) | | 14.64(1.84-238.37) | | 12.09(0.22-374.06) | | 0.612 |  |
| **IMT data** |  |  |  |  |  |  |  |  |
| Worst IMT side | 0.70±0.145 | | 0.58±0.077 | | 0.77±0.129 | |  |  |
| Vascular age | 58.27±12.93 | | 45.15±7.31 | | 67.81±13.53 | |  |  |
| **Diabetes complications** |  |  |  |  |  |  |  |  |
| Retinopathy, yes, n (%) | 36(37.1) | | 7(35) | | 8(24.2) | | 0.401 |  |

FH=family history. TD= thyroid disease. CAD= coronary artery disease. BMI= body mass index. WHR= waist-to-hip ratio.CV= cardiovascular. CRP= C-reactive protein. TSH = thyroid-stimulating hormone. Free T4= free thyroxine hormone. GFR= glomerular filtration rate calculated by CKD-EPI formula. IMT= intima-media thickness. Data are presented in mean ± SD or in median and interquartile range [IQR].
